# Supplementary material
Source: Springer Nature journal article supplement (https://www.springermedizin.de/resource/supplementary/12962_2008_111_MOESM1_ESM.pdf/9572222)
Supplement: MOESM1 [file 9572222]

## **Costs**

Utility in anticipation of activity forgone, expressed in QALY

Utility in use of activity forgone, expressed in monetary terms

## **Benefits**

Utility in anticipation of exercise, expressed in QALY

Utility in use of exercise, expressed in monetary terms
